# Supplementary material for: Effects of Insertion of Ag Mid-Layers on Laser Direct Ablation of Transparent Conductive ITO/Ag/ITO Multilayers: Role of Effective Absorption and Focusing of Photothermal Energy
Source: MDPI journal article supplement (doi:10.3390/ma14185136), 2021-09-07
Supplement: s1 [file s1]

Supplementary

# Effects of insertion of Ag mid-layers on laser direct ablation of transparent conductive ITO/Ag/ITO multilayers: role of effective absorption and focusing of photothermal energy

Younggon Choi <sup>1,†</sup>, Hong-Seok Kim <sup>2,†</sup>, Haunmin Lee <sup>3</sup>, Wonjoon Choi <sup>3</sup>, Sang Jik Kwon <sup>1</sup>, Jae-Hee Han <sup>2,\*</sup> and Eou-Sik Cho <sup>1,\*</sup>

<sup>1</sup> Department of Electronic Engineering, Gachon University, 1342 Seongnam-daero, Sujeong-gu, Seongnam-si 13120, Gyeonggi-do, Korea; cyg1994@gmail.com (Y.C.); sjkwon@gachon.ac.kr (S.J.K.)

<sup>2</sup> Department of Materials Science and Engineering, Gachon University, 1342 Seongnam-daero, Sujeong-gu, Seongnam-si 13120, Gyeonggi-do, Korea; hskim2024@gmail.com

<sup>3</sup> School of Mechanical Engineering, Korea University, 145 Anam-ro, Seongbuk-gu, Seoul 02841, Korea; skekgusals@korea.ac.kr (H.L.); wojchoi@korea.ac.kr (W.C.)

\* Correspondence: jhhan388@gachon.ac.kr (J.-H.H.); es.cho@gachon.ac.kr (E.-S.C.)

† These authors contributed equally to this work.

## Simulation conditions

### 1. Material properties

| Parameters                                                         | Material | Value              |
|--------------------------------------------------------------------|----------|--------------------|
| Specific heat, $C_p$ (Jkg <sup>-1</sup> K <sup>-1</sup> )          | Glass    | 880                |
|                                                                    | Ag       | 240                |
|                                                                    | ITO      | 753                |
| Density, $\rho$ (gcm <sup>-3</sup> )                               | Glass    | 2.5                |
|                                                                    | Ag       | 10.49              |
|                                                                    | ITO      | 7.13               |
| Thermal conductivity, $\kappa$ (Wm <sup>-1</sup> K <sup>-1</sup> ) | Glass    | 0.94               |
|                                                                    | Ag       | 429                |
|                                                                    | ITO      | 11.5               |
| Absorption coefficient, $\alpha$ (m <sup>-1</sup> ) (at 1064 nm)   | Glass    | 50                 |
|                                                                    | Ag       | $1.03 \times 10^7$ |
|                                                                    | ITO      | $4 \times 10^5$    |
| Reflection coefficient, $R$ (at 1064 nm)                           | Glass    | 0.04               |
|                                                                    | Ag       | 0.64               |
|                                                                    | ITO      | 0.01               |

## 2. Laser beam design (Gaussian beam)

$$Q(x, y, z) = Q_0(1 - R_c) \frac{A_c}{\pi \sigma_x \sigma_y} e^{-\left[ \frac{(x-x_0)^2}{2\sigma_x^2} + \frac{(y-y_0)^2}{2\sigma_y^2} \right]} \cdot e^{-A_c z} \cdot f(t)$$

( $Q_0$ , total power input;  $R_c$ , reflection coefficient;  $A_c$ , absorption coefficient;  $f(t)$ , 10 ns pulse)

## 3. Specific set parameters of the materials

- Glass substrate: 1  $\mu\text{m}$
- Ag layer thickness: 6, 13, 16 nm
- Laser beam width: 80  $\mu\text{m}$
- Laser beam: 1064 nm (wavelength), duration of 10 ns
- Given pulse energy: 0.39 J/cm<sup>2</sup>
